# Supplementary material for: A Role for Exchange of Extracellular Vesicles in Porcine Spermatogonial Co-Culture
Source: MDPI journal article supplement (doi:10.3390/ijms23094535), 2022-04-20
Supplement: s1 [file s1]

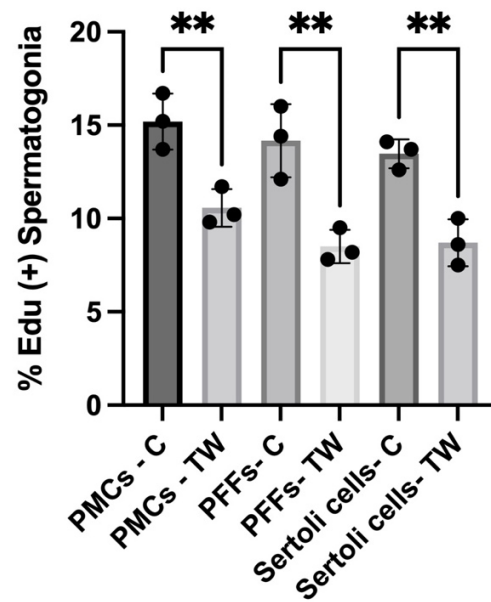

**Figure S1:** Proliferation of spermatogonia co-cultured in contact with feeders is higher than proliferation of spermatogonia co-cultured with feeders with physical separation using transwell inserts. Percent of UCH-L1 (+) spermatogonia from 1- week-old pigs that are also EdU (+), in co-culture conditions at 1 week of culture, using PMC, PFF, and Sertoli cell feeders.  $n = 3$ , mean  $\pm$  SD. \*\*  $p \leq 0.01$ .

**Table S1:** Reagents and Resources.

| REAGENT or RESOURCE                                                        | SOURCE                                      | IDENTIFIER       |
|----------------------------------------------------------------------------|---------------------------------------------|------------------|
| Antibodies                                                                 |                                             |                  |
| Rabbit monoclonal IgG anti PGP 9.5                                         | Abcam                                       | CAT#108986       |
| Mouse monoclonal IgG2a anti PGP-9.5                                        | Abcam                                       | CAT#8189         |
| Mouse monoclonal IgG2a anti Gata-4                                         | Santa Cruz Biotechnology                    | CAT#sc-25310     |
| Rabbit polyclonal IgG2a anti desmin                                        | Abcam                                       | CAT#ab8592       |
| Mouse monoclonal biotinylated- anti CD-31                                  | Abcam                                       | CAT#ab199734     |
| Alexa Flour 488 Donkey Anti-Mouse IgG                                      | Thermo Fisher                               | CAT#A21202       |
| Alexa Flour 594 Donkey Anti-Rabbit IgG                                     | Thermo Fisher                               | CAT#A21207       |
| Alexa Flour 594 Donkey Anti-Mouse IgG                                      | Thermo Fisher                               | CAT#A21203       |
| Biological Samples                                                         |                                             |                  |
| 1-week-old pig testis tissue                                               | Sunterra Farms Ltd, Acme, AB, Canada        | N/A              |
| 8-week-old pig testis tissue                                               | University of Alberta, Edmonton, AB, Canada | N/A              |
| Chemicals, Peptides, and Recombinant Proteins                              |                                             |                  |
| GDNF Recombinant human                                                     | Bio Technology                              | CAT#212-Gd-010   |
| EGF Recombinant human                                                      | Bio Technology                              | CAT#236EG200     |
| GFRA                                                                       | Bio Technology                              | CAT#560GR100     |
| Insulin                                                                    | Sigma                                       | CAT#I0516        |
| Holo-Transferrin                                                           | Sigma                                       | CAT#T12843       |
| Beta-Mercaptoethanol                                                       | Sigma                                       | CAT#M3148        |
| Bovine serum albumin (BSA)                                                 | Sigma                                       | CAT#A7906        |
| GW4869                                                                     | Sigma                                       | CAT# D1692-5MG   |
| PKH67 Green Fluorescent Cell Linker Kit for General Cell Membrane Labeling | Sigma                                       | CAT# PKH67GL-1KT |

|                                                                      |               |                                                                                                                       |
|----------------------------------------------------------------------|---------------|-----------------------------------------------------------------------------------------------------------------------|
| CAS block                                                            | ThermoFisher  | CAT#008120                                                                                                            |
| Mitomycin- C                                                         | Sigma         | CAT#M4287-2MG                                                                                                         |
| Critical Commercial Assays                                           |               |                                                                                                                       |
| RNeasy Mini Kit                                                      | Quiagen       | CAT#74104                                                                                                             |
| SSoFast EvaGreen Supermix with Low ROX                               | Bio-Rad       | CAT#172-5211                                                                                                          |
| Click-iT™ EdU Imaging Kit with Alexa Fluor™ 488                      | Thermo Fisher | CAT#C10086                                                                                                            |
| Click-iT™ TUNEL Alexa Fluor™ 488 Imaging Assay, for microscopy & HSC | Thermo Fisher | CAT#C10245                                                                                                            |
| Vybrant™ Alexa Fluor™ 488 Lipid Raft Labeling Kit                    | ThermoFisher  | CAT#V34403                                                                                                            |
| Oligonucleotides                                                     |               |                                                                                                                       |
| See Supplemental Table S2                                            |               |                                                                                                                       |
| Software and Algorithms                                              |               |                                                                                                                       |
| ImageJ                                                               | N/A           | <a href="https://imagej.nih.gov/ij/">https://imagej.nih.gov/ij/</a>                                                   |
| GraphPad Prism Version 9.3.1                                         | N/A           | <a href="https://www.graphpad.com/scientific-software/prism/">https://www.graphpad.com/scientific-software/prism/</a> |

**Table S2:** Oligonucleotides.

|       |                                                                                        |                                                                     |                       |
|-------|----------------------------------------------------------------------------------------|---------------------------------------------------------------------|-----------------------|
| GDNF  | <i>Sus scrofa</i><br>glial cell<br>derived<br>neurotrophin<br>c factor                 | F:<br>TGTCGTGGCTGTCTGCCT<br>GGTG<br>R:<br>GGCGCCTCGGGAGGCCT<br>CTTA | Kakiuchi et al., 2018 |
| BMP3  | <i>Sus scrofa</i><br>bone<br>morphogenetic<br>protein 3                                | F:TCTCCCCCAAGTCCTTC<br>GAT<br>R:ACCCCCACAGCTCTGA<br>CTAT            | NM_001206388.1        |
| BMP4  | <i>Sus scrofa</i><br>bone<br>morphogenetic<br>protein 4                                | F:AGCTTTCACCACGAAG<br>AACA<br>R:GGTGGGGGCTTCATAA<br>CCTC            | NM_001101031.2        |
| VEGF  | <i>Sus scrofa</i><br>vascular<br>endothelial<br>growth<br>factor A<br>(VEGFA),<br>mRNA | F:<br>ATCGCCATGCAGATTAT<br>GCG<br>R:<br>AAATGCTTTCTCCGCTCC<br>GA    | NM_214084.1           |
| KIT   | <i>Sus scrofa</i><br>KIT proto-<br>oncogene,<br>receptor<br>tyrosine<br>kinase         | F:GTGGTCAAAGGAAAC<br>GCTCG<br>R:CCCATAGGACCAGAC<br>ATCGC            | NM_001044525.1        |
| NELL2 | <i>Sus scrofa</i><br>EGFL like 2                                                       | F:<br>CAAAACGTCAGCCAAGC<br>TGT<br>R:TCCATTCAGGCATGTG<br>CAGT        | XM_021092577.1        |
| IGF1  | <i>Sus scrofa</i><br>insulin like                                                      | F:GCCCAAGGCTCAGAAG<br>GAAGTA                                        | NM_214256.1           |

|       |                                                          |                                                                  |                |
|-------|----------------------------------------------------------|------------------------------------------------------------------|----------------|
|       | growth factor 1                                          | R:TAAGTCGTGCAGAGCA<br>AAGGA                                      |                |
| EGF   | <i>Sus scrofa</i><br>epidermal<br>growth<br>factor (EGF) | F:ACGGATTTGCCCTGAC<br>CCTA<br>R:AGTCTCTGTGCTGACA<br>TCGC         | NM_214020.2    |
| FGF-2 | <i>Sus scrofa</i><br>fibroblast<br>growth<br>factor 2    | F:CGGTTGTACTGCAAAA<br>ACGG<br>R:<br>TGAAGTTGTAGTTTGATG<br>TGAGGG | XM_021100546.1 |
| CSF-1 | <i>Sus scrofa</i><br>colony<br>stimulating<br>factor 1   | F:<br>ACCATGCGCTTCAGAGA<br>CAA<br>R:<br>TGGAGGGGCGTCTCATA<br>GAA | NM_001244523.1 |

**Table S3:** Transwell Experiment Conditions.

| Condition                            | Description                                                                       |
|--------------------------------------|-----------------------------------------------------------------------------------|
| Contact (C)                          | Spermatogonia seeded directly on top of feeders                                   |
| Transwell (TW)                       | Feeders placed on the bottom of wells, and spermatogonia in the transwell inserts |
| Co-culture- conditioned media (CCCM) | Feeder-free culture using conditioned                                             |

|                                                       |                                                                                                                                                                                                                                                    |
|-------------------------------------------------------|----------------------------------------------------------------------------------------------------------------------------------------------------------------------------------------------------------------------------------------------------|
|                                                       | media from co-cultures                                                                                                                                                                                                                             |
| Feeder- conditioned media (FCM)                       | Feeder-free culture using conditioned media from feeders                                                                                                                                                                                           |
| Spermatogonia on Co-cultures<br>(Spermatogonia on CC) | Spermatogonia and feeders placed on the bottom of wells, and a second group of spermatogonia placed in the transwell inserts ( $1.0 \times 10^5$ spermatogonia in the insert and $1.0 \times 10^5$ spermatogonia in contact with the feeder cells) |
| Spermatogonia in transwells<br>(SG in TW)             | Spermatogonia cultured feeder-free in the transwell inserts in unconditioned $\alpha$ -MEM with additives                                                                                                                                          |
| Spermatogonia under transwells<br>(SG under TW)       | Spermatogonia cultured feeder-free in unconditioned $\alpha$ -MEM with additives in the bottom of the well, with an empty transwell insert above                                                                                                   |

**Table S4:** Feeder Cell Gene Expression Data.

| Gene | $\Delta$ CT values |      |      | Mean FC       |      |      | p- value |        |         |
|------|--------------------|------|------|---------------|------|------|----------|--------|---------|
|      | Sertoli cells      | PMCs | PFFs | Sertoli cells | PMCs | PFFs | SC-PMC   | SC-PFF | PMC-PFF |

|       |        |        |        |   |        |        |         |        |        |
|-------|--------|--------|--------|---|--------|--------|---------|--------|--------|
| IGF1  | 5.537  | 4.326  | 5.18   | 1 | 2.794  | 1.961  | 0.0674  | 0.6887 | 0.3612 |
| EGF   | 10.43  | 9.714  | 8.900  | 1 | 1.765  | 3.068  | 0.2719  | 0.1079 | 0.2820 |
| BMP4  | 1.973  | 3.347  | 4.059  | 1 | 0.392  | 0.2560 | 0.0081  | 0.0231 | 0.2161 |
| BMP3  | 10.08  | 9.533  | 5.836  | 1 | 2.341  | 21.229 | 0.5403  | 0.0069 | 0.0071 |
| NELL2 | 5.336  | 7.684  | 8.573  | 1 | 0.265  | 0.1120 | 0.0345  | 0.0149 | 0.2367 |
| TNF   | 12.13  | 10.17  | 11.12  | 1 | 8.320  | 2.074  | 0.2000  | 0.4032 | 0.4000 |
| FGF2  | 2.416  | 1.948  | 1.808  | 1 | 1.717  | 1.558  | 0.5510  | 0.1404 | 0.8468 |
| CSF1  | 1.714  | 1.94   | 0.5123 | 1 | 1.272  | 2.427  | 0.8096  | 0.1086 | 0.1802 |
| GDNF  | 3.048  | 5.434  | 6.010  | 1 | 0.217  | 0.1510 | 0.0092  | 0.0058 | 0.1989 |
| KIT   | 3.688  | 4.414  | 7.028  | 1 | 0.648  | 0.1070 | 0.1952  | 0.0176 | 0.0544 |
| VEGF  | 2.504  | 1.398  | 2.147  | 1 | 2.818  | 2.132  | >0.9999 | 0.7000 | 0.3559 |
| HPRT  | 3.029  | 3.192  | 3.951  | 1 | 0.9360 | 0.5286 | 0.5998  | 0.0055 | 0.0839 |
| EIF   | 0.5653 | 0.4297 | 0.2737 | 1 | 1.099  | 1.230  | 0.1000  | 0.0903 | 0.4000 |
| RLP   | -3.594 | -3.620 | -4.225 | 1 | 1.056  | 1.550  | 0.9191  | 0.0070 | 0.1158 |
